# Supplementary material for: The Exonuclease TREX1 Constitutes an Innate Immune Checkpoint Limiting cGAS/STING-Mediated Antitumor Immunity
Source: PubMed Central journal article supplement — Cancer Immunol Res. 2024 Mar 15;12(6):663–72. doi: 10.1158/2326-6066.CIR-23-1078 (PMC11148535; doi:10.1158/2326-6066.cir-23-1078), 2024-03-15
Supplement: cir-23-1078_supplementary_figure_1_suppsf1.pdf [file cir-23-1078_supplementary_figure_1_suppsf1.pdf]

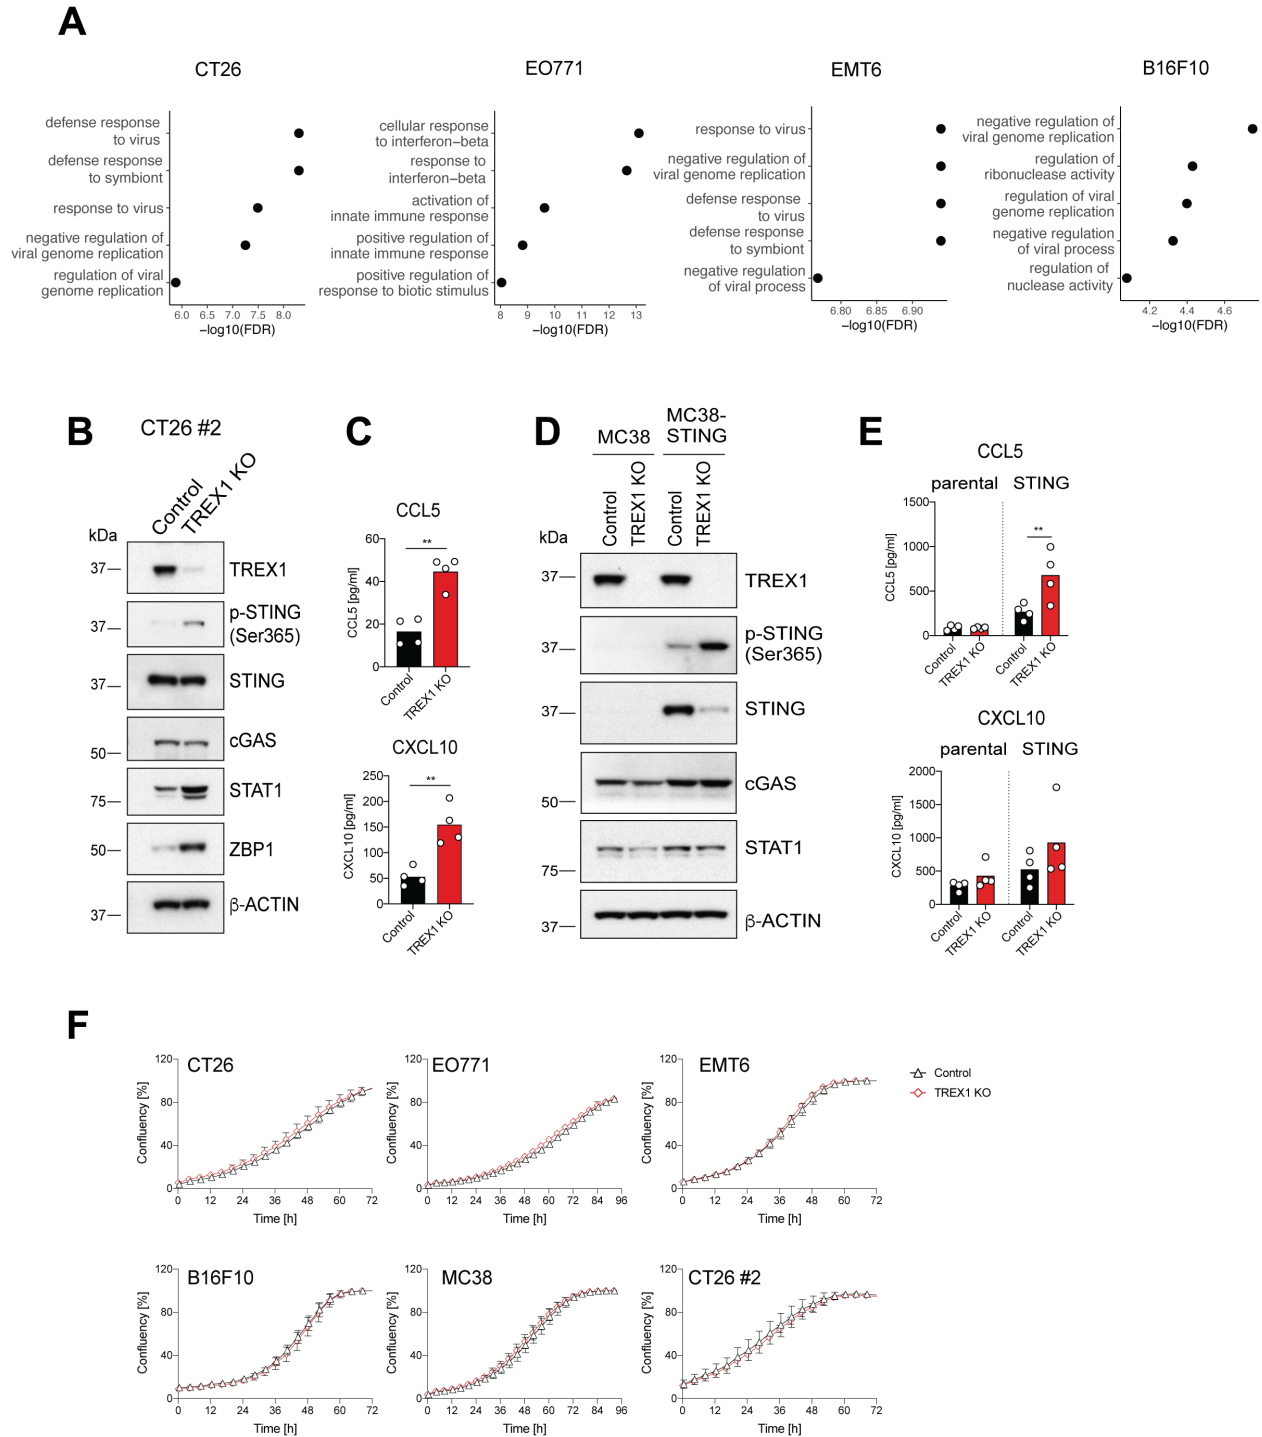

**Supplementary Figure 1. TREX1 limits an ISG response in CT26 and STING-expressing MC38 cells.**

**A.** Top 5 GO terms enriched in genes upregulated in CT26, EO771, EMT6 and B16F10 upon TREX1 loss.

No GO terms were significant for genes upregulated in TREX1-deficient MC38 cells. **B.** Representative

western blots of TREX1, p-STING (Ser365), STING, cGAS, STAT1, ZBP1 and  $\beta$ -ACTIN in control and TREX1 KO CT26 cell line #2 (n=4). **C.** CCL5 and CXCL10 protein levels in supernatants. Circles represent independent experiments. Bars represent the mean (n=4). Unpaired *t*-test. \*\*P < 0.01. **D.** Representative western blots of TREX1, p-STING (Ser365), STING, cGAS, STAT1, ZBP1 and  $\beta$ -ACTIN in parental and STING expressing control or TREX1 KO MC38 cells (n=4). **E.** CCL5 and CXCL10 protein levels in supernatants. Circles represent independent experiments. Bars represent the mean (n=4). Multiple *t*-test. \*\*P < 0.01. **F.** Representative cell growth curves measured by Incucyte. Cell growth rates were calculated by phase object confluence as % of total (n=4). Lines represent the mean  $\pm$  SD of replicates.
