# Supplementary material for: The Exonuclease TREX1 Constitutes an Innate Immune Checkpoint Limiting cGAS/STING-Mediated Antitumor Immunity
Source: PubMed Central journal article supplement — Cancer Immunol Res. 2024 Mar 15;12(6):663–72. doi: 10.1158/2326-6066.CIR-23-1078 (PMC11148535; doi:10.1158/2326-6066.cir-23-1078), 2024-03-15
Supplement: cir-23-1078_supplementary_figure_2_suppsf2.pdf [file cir-23-1078_supplementary_figure_2_suppsf2.pdf]

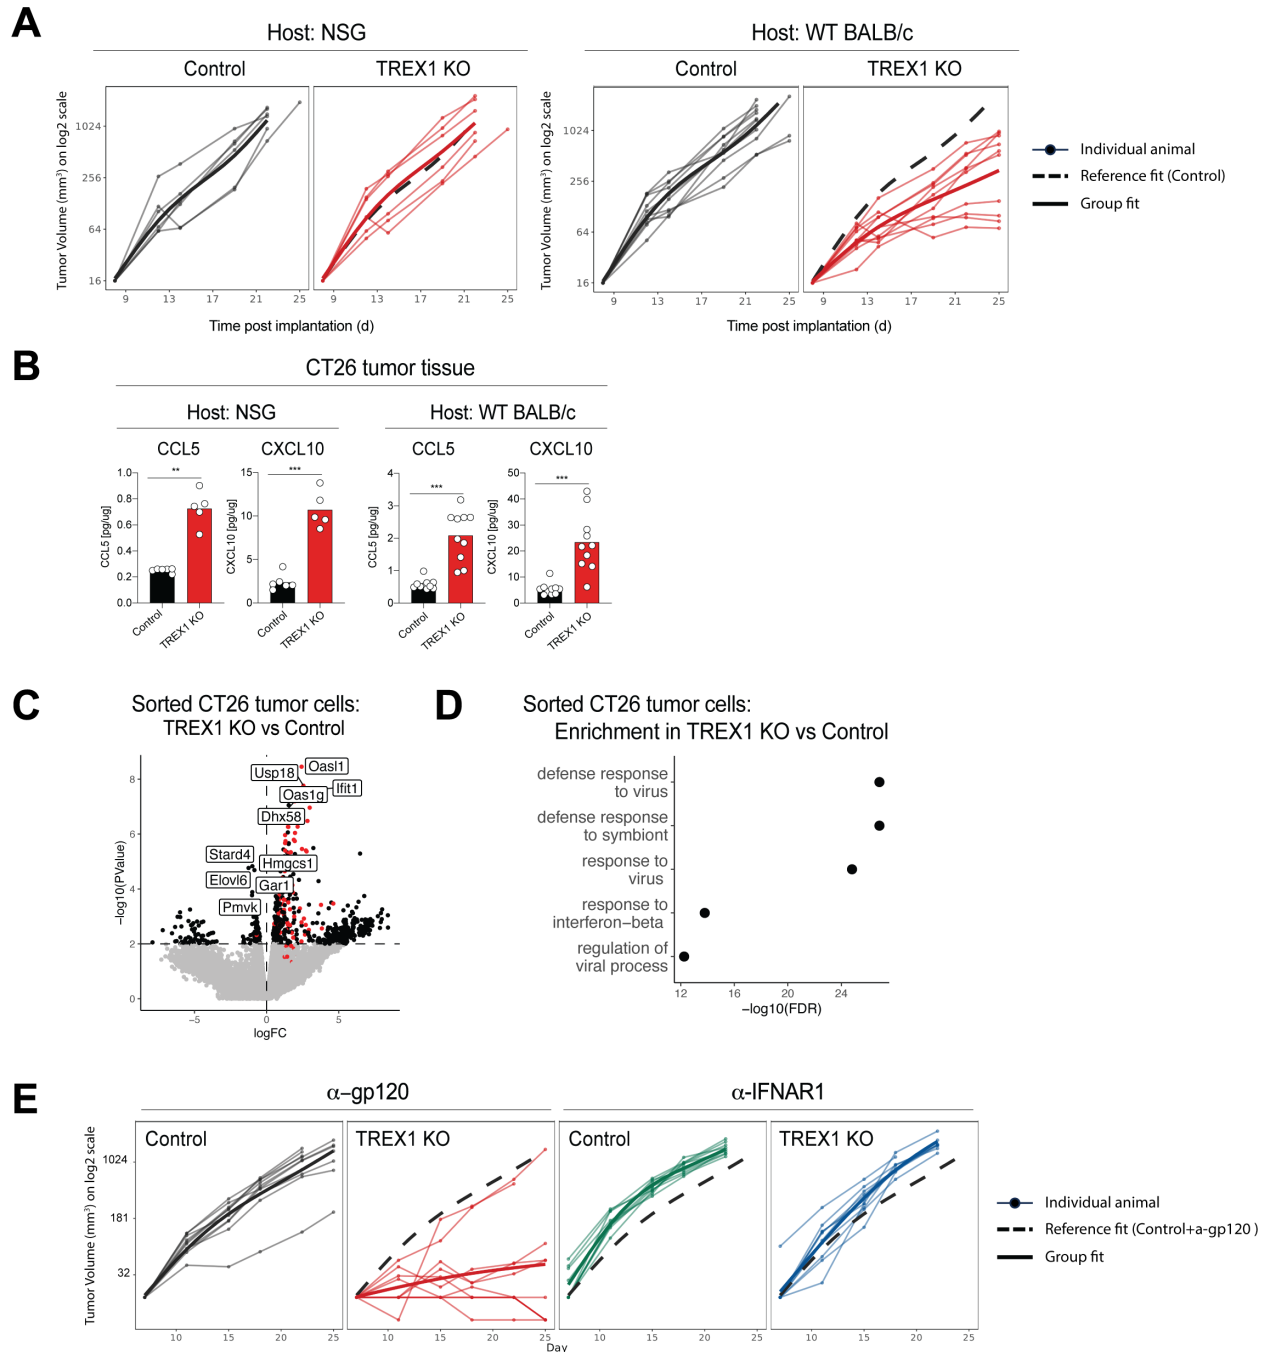

**Supplementary Figure 2. Tumor-intrinsic TREX1 loss impairs CT26 tumor growth in immunocompetent mice in a cGAS dependent manner.**

**A.** Spider plots showing tumor growth curves of individual animals. Control and TREX1 KO CT26 tumors were implanted into NSG (left, n=6) or BALB/c animals (right, n=10). **B.** CCL5 and CXCL10 protein levels in CT26 tumors tissue. Circles represent individual animals. Bars represent the mean. Unpaired *t*-test with

Welch's correction (NSG: control n=6, TREX1 KO n=5; BALB/c: control n=10, TREX1 KO n=10). \*\* $P < 0.01$ , \*\*\* $P < 0.001$ . **C.** Volcano plot showing genes differentially expressed comparing sorted (CD45-CD31-PDGFRa-) control and TREX1 KO CT26 tumor cells after adjusting for the immune cell fraction. The five genes with the lowest p-value for positive and negative log fold change are labelled. Horizontal dashed line represents a  $P$ -value cutoff of 0.01. ISGs are highlighted in red. **D** Top five GO terms enriched in genes differentially expressed between sorted (CD45-CD31-PDGFRa-) control and TREX1 KO CT26 tumor cells. **E.** Spider plots showing control and TREX1 KO tumor growth curves of individual animals upon anti-IFNAR1
