# Supplementary material for: The Exonuclease TREX1 Constitutes an Innate Immune Checkpoint Limiting cGAS/STING-Mediated Antitumor Immunity
Source: PubMed Central journal article supplement — Cancer Immunol Res. 2024 Mar 15;12(6):663–72. doi: 10.1158/2326-6066.CIR-23-1078 (PMC11148535; doi:10.1158/2326-6066.cir-23-1078), 2024-03-15
Supplement: cir-23-1078_supplementary_figure_3_suppsf3.pdf [file cir-23-1078_supplementary_figure_3_suppsf3.pdf]

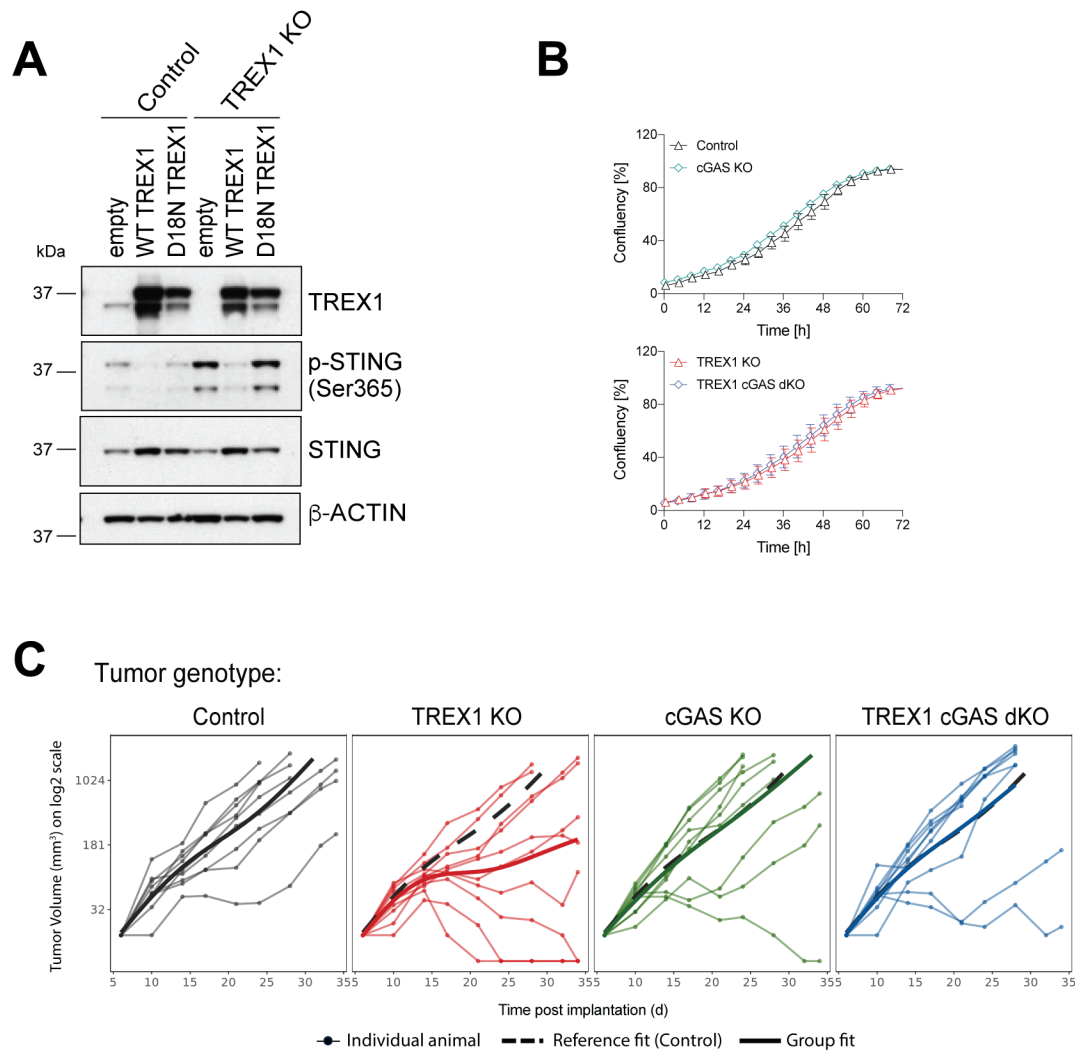

**Supplementary Figure 3. Assessment of TREX1's catalytic activity and cGAS dependency.**

**A.** Representative western blots of TREX1, p-STING (Ser365), STING, and  $\beta$ -ACTIN in CT26 cells of the indicated genotype (n=3). **B.** Representative cell growth curves measured by Incucyte. Cell growth rates were calculated by phase object confluence as % of total (n=3). Lines represent the mean  $\pm$  SD of replicates. **C.** Spider plots showing CT26 tumor growth curves of individual animals (TREX1 KO n=10; Control, cGAS KO, TREX1 cGAS dKO n=9 per group).
